# Supplementary material for: 4D volcanic geology of Hachijo-jima islet, Izu-Bonin arc
Source: Research Square preprint supplement (doi:10.21203/rs.3.rs-448867/v1), 2021-04-23
Supplement: Supplementary file 1 [file ba7123664d30e96d78183d61.xlsx]

## Sheet: Sheet1
	Mihara-yama stratovolcano			Hachijo-Fuji stratovolcano
age	diameter	area	elevation	diameter	area	elevation
0.89 Ma	3.5 km	10 km2	330 m	0 km	0 km2	0 m
< 0.24 Ma	8.5 km	55 km2	1000 m	0 km	0 km2	0 m
> 0.0095 Ma	8.5 km	55 km2	> 700 m	6 km	30 km2	850 m
